# 1 Genome sequencing of the bacteriophage CL31 and 2 interaction with the host strain *Corynebacterium* 3 *glutamicum* ATCC 13032

4 Max Hünnefeld, Ulrike Viets, Vikas Sharma, Astrid Wirtz, Aël Hardy, and Julia  
5 Frunzke\*

6 Institute of Bio- and Geosciences: IBG-1, Forschungszentrum Jülich, 52425 Jülich, Germany;

7 \* Correspondence: [j.frunzke@fz-juelich.de](mailto:j.frunzke@fz-juelich.de), Tel.: +49-2461-615430

## 8 **Abstract:**

9 In this study, we provide a comprehensive analysis of the genomic features of the  
10 phage CL31 and the infection dynamics with the biotechnologically relevant host  
11 strain *Corynebacterium glutamicum* ATCC 13032. Genome sequencing and  
12 annotation of CL31 revealed a 45-kbp genome composed of 72 open reading  
13 frames, mimicking the GC content of its host strain (54.4 %). An ANI-based distance  
14 matrix showed the highest similarity of CL31 to the temperate corynephage  $\Phi$ 16.  
15 While the *C. glutamicum* ATCC 13032 wild type strain showed only mild  
16 propagation of CL31, a strain lacking the *cglIR-cglIIR-cglIM* restriction-modification  
17 system was efficiently infected by this phage. Interestingly, the prophage-free  
18 strain *C. glutamicum* MB001 featured an even accelerated amplification of CL31  
19 compared to the  $\Delta$ *resmod* strain suggesting a role of cryptic prophage elements in  
20 phage defense. Proteome analysis of purified phage particles and transcriptome  
21 analysis provide important insights into structural components of the phage and  
22 the response of *C. glutamicum* to CL31 infection. Isolation and sequencing of CL31-  
23 resistant strains revealed SNPs in genes involved in mycolic acid biosynthesis  
24 suggesting a role of this cell envelope component in phage adsorption. Altogether,  
25 these results provide an important basis for further investigation of phage-host  
26 interactions in this important biotechnological model organism.

27

28 **Keywords:** phage-host interaction, CL31, Corlili, corynephage, tandem repeats

29

30

---

## 31 1. Introduction

32 The Gram-positive actinobacterium *Corynebacterium glutamicum* represents an  
33 important biotechnological platform strain used for the production of amino acids  
34 at million tons scale as well as for the production of organic acids, polymer  
35 precursors, and proteins [1]. This study focuses on derivatives of the model strain  
36 *C. glutamicum* ATCC 13032 (NCBI accession number BX927147) [2]. The genome of  
37 this strain includes three cryptic prophages, of which two (CGP1 & 2) are small and  
38 highly degenerated, while the third one (CGP3) was shown to be still inducible [3].  
39 The CGP3 island also harbors a restriction modification (resmod) system (*cglIM*,  
40 *cglIR*, and *cglIIR*), which was previously shown to confer resistance to phage  
41 infection [4,5]. Besides the wild type strain *C. glutamicum* ATCC 13032, this study  
42 also includes two derivative strains: a strain lacking the resmod system ( $\Delta$ *resmod*)  
43 and the prophage-free variant MB001 [6].

44 Bacteriophages represent a ubiquitous threat to biotechnological processes,  
45 since phage infection may lead to high biomass losses. Besides that, phages can serve  
46 as a source of important molecular biology tools and fully adapted modulators,  
47 which can be harnessed for metabolic engineering and synthetic biology  
48 applications [7,8].

49 Although the first phages infecting *C. glutamicum* were already described in the  
50 1970s, until now the number of characterized phages infecting this host is limited  
51 and genome sequence is available for only few of them. Among those are the  
52 temperate phage  $\Phi$ 16 [9–11], as well as the virulent phages BFK20 [12,13],  $\Phi$ 673 and  
53  $\Phi$ 674 [14], and P1201 [15]. In particular, the lytic phage BFK20 was well  
54 characterized with regard to its host spectrum and interaction, its transcriptional  
55 profile, and functions of single BFK20-encoded proteins [12,16,17]. Furthermore,  
56 BFK20 promoters were applied in an overexpression system for recombinant RNAs  
57 in *C. glutamicum* [18]. Another example of application of corynephage-derived  
58 systems is represented by  $\Phi$ 16. This temperate phage provided the basis for the  
59 construction of a site-specific integration vector for *C. glutamicum* [19].

60 This study focuses on the phage CL31, which was first identified in 1985 by Yeh  
61 and colleagues as a phage infecting *C. glutamicum* ATCC 15059 (previously known  
62 as *Corynebacterium lilium*) [20]. In further studies, Trautwetter and colleagues  
63 described CL31 as a siphophage with a narrow host range (4 out of 30 tested strains  
64 were lysed) consisting of approximately eight structural proteins and a linear 48 kb  
65 double-stranded DNA genome with cohesive ends [21]. Phage ‘Corlili’ listed in the  
66 actinobacteriophage database (phagesdb.org) actually refers to the very same phage  
67 [22].

68 In this study, we performed genome sequencing and annotation of phage CL31.  
69 Analysis of infection dynamics and transcriptome analysis confirmed the central  
70 role of the resmod system in phage defense and showed a significant impact of the  
71 presence of cryptic prophage elements on phage amplification. Single nucleotide  
72 polymorphisms (SNPs) conferring resistance to CL31 infection converged in  
73 pathways involved in mycolic acid synthesis, shedding light on the molecular

74 adsorption mechanism of this CL31. Altogether, these data provide an important  
75 ground for further investigation of phage-host interactions in this important  
76 biotechnological model organism.

77

78

## 79 2. Materials and Methods

### 80 2.1 Bacterial strains, plasmids and growth conditions

81 Bacterial strains and plasmids used in this work are listed in Table 1. For cloning  
82 and plasmid construction the strain *Escherichia coli* DH5 $\alpha$  was used. Unless stated  
83 otherwise, this strain was cultivated in lysogeny broth (LB, [23]) containing 50  $\mu$ g/ml  
84 kanamycin. *Corynebacterium glutamicum* ATCC 13032 (Accession: BX927147) was  
85 used as a wild type strain [2]. This wild type strain and all derived *C. glutamicum*  
86 strains were cultivated in brain heart infusion medium (BHI, Difco Laboratories,  
87 Detroit, MI, USA), if necessary 25  $\mu$ g/ml kanamycin was added. For the cultivation  
88 of *C. glutamicum*, a first pre-culture was inoculated with single colonies from agar  
89 plates either directly after transformation or after a streak-out of glycerol cultures.  
90 These pre-cultures were conducted in 4.5 ml BHI medium in test tubes or –  
91 depending on the purpose - in 1 ml BHI medium in 96-well deep well plates (DWPs)  
92 at 30°C overnight. For all infection experiments, a starting OD<sub>600</sub> of 0.5 was used. If  
93 not stated otherwise, the multiplicity of infection (MOI) was set to 0.1. To start  
94 infection, bacteria and phages were mixed in 1/5<sup>th</sup> of the final media volume and pre-  
95 incubated for 5 min at RT to allow phage attachment to the host cells. Subsequently,  
96 the culture was filled-up to the final volume and incubation was started at 30°C and  
97 120 rpm. Additionally, growth experiments were conducted in the BioLector  
98 microbioreactor system (m2p labs, Baesweiler, Germany) [24]. Therefore, 750  $\mu$ l BHI  
99 medium were inoculated to an OD<sub>600</sub> of 0.5 in 48-well microtiter plates (Flowerplates,  
100 m2p labs). CL31 phages were added to reach the desired MOI and after a 10 min  
101 pre-incubation without shaking at RT, the main cultivation was conducted at 30°C  
102 and 1200 rpm shaking frequency. During this cultivation, backscatter was measured  
103 with an excitation wavelength of 620 nm (filter module:  $\lambda$ Ex/  $\lambda$ Em: 620 nm/ 620 nm,  
104 gain: 20) in 15 minutes intervals.

105 For double-layered agar overlay plates, a top layer of soft agar (0.4% agarose in  
106 BHI medium) containing the respective host bacteria (OD<sub>600</sub> 0.5) was poured on top  
107 of a bottom agar layer (2% agar-agar in BHI medium).

108

109 **Table 1.** Bacterial strains and plasmids used in this study.

| Strain or Plasmid                           | Characteristics                                                                                                                                                     | Reference  |
|---------------------------------------------|---------------------------------------------------------------------------------------------------------------------------------------------------------------------|------------|
| <b>Bacterial Strains</b>                    |                                                                                                                                                                     |            |
| <i>E. coli</i> DH5 $\alpha$                 | <i>supE44</i> $\Delta$ <i>lacU169</i> ( $\phi$ 80 <i>lacZ</i> D <sub>M</sub> 15) <i>hsdR17</i><br><i>recA1</i> <i>endA1</i> <i>gyrA96</i> <i>thi-1</i> <i>relA1</i> | Invitrogen |
| <i>C. glutamicum</i> ATCC 13032             | Biotin-auxotrophic wild type (Accession: BX927147)                                                                                                                  | [25]       |
| <i>C. glutamicum</i> $\Delta$ <i>resmod</i> | ATCC 13032 with in-frame deletion of restriction-modification system <i>cgIIIR-cgIIIR-cgIIIM</i> (cg1996-cg1998), located within prophage CGP3                      | [6]        |
| <i>C. glutamicum</i> MB001                  | ATCC 13032 with in-frame deletion of                                                                                                                                | [6]        |

|                                                     |                                                                                                                                                                               |           |
|-----------------------------------------------------|-------------------------------------------------------------------------------------------------------------------------------------------------------------------------------|-----------|
|                                                     | prophages CGP1 (cg1507-cg1524), CGP2 (cg1746-cg1752), and CGP3 (cg1890-cg2071)                                                                                                |           |
| <i>C. glutamicum</i> MB001:: <i>pks_Tyr886Asp</i>   | <i>C. glutamicum</i> MB001 with a nucleotide exchange (T2656G) causing the amino acid exchange Tyr886Asp                                                                      | This work |
| <i>C. glutamicum</i> MB001:: <i>accD2_Gly350Asp</i> | <i>C. glutamicum</i> MB001 with a nucleotide exchange (G1049A) causing the amino acid exchange Gly350Asp                                                                      | This work |
| <i>C. glutamicum</i> MB001:: <i>accD3_Gly341Asp</i> | <i>C. glutamicum</i> MB001 with a nucleotide exchange (G1022A) causing the amino acid exchange Gly341Asp                                                                      | This work |
| <b><u>Plasmids</u></b>                              |                                                                                                                                                                               |           |
| pK19 <i>mobsacB</i>                                 | Kan <sup>R</sup> ; plasmid for allelic exchange in <i>C. glutamicum</i> ; (pK18 <i>oriVE.c.</i> , <i>sacB</i> , <i>lacZα</i> )                                                | [26]      |
| pK19 <i>mobsacB -pks_T2656G</i>                     | Kan <sup>R</sup> ; Variant of pK19 <i>mob sacB</i> ; plasmid used for the integration of the nucleotide exchange causing the missense mutation Tyr886Asp in <i>pks</i> gene   | This work |
| pK19 <i>mobsacB -accD2_G1049A</i>                   | Kan <sup>R</sup> ; Variant of pK19 <i>mob sacB</i> ; plasmid used for the integration of the nucleotide exchange causing the missense mutation Gly350Asp in <i>accD2</i> gene | This work |
| pK19 <i>mobsacB -accD3_G1022A</i>                   | Kan <sup>R</sup> ; Variant of pK19 <i>mob sacB</i> ; plasmid used for the integration of the nucleotide exchange causing the missense mutation Gly341Asp in <i>accD3</i> gene | This work |

110 2.2 Recombinant DNA work and construction of chromosomal insertions or deletions

111 All standard laboratory methods (PCR, DNA restriction, Gibson Assembly)  
112 were performed according to standard protocols and manufacturer's instructions  
113 [23,27]. The used oligonucleotides as well as details regarding the plasmid  
114 construction are provided in the supporting information (Table S1 and Table S2).  
115 For genomic substitution of the mutated genes variants, a two-step homologous  
116 recombination system based on the suicide vector pK19*mobsacB* was used [28,29].  
117 This vector contained 500 bps of each site flanking the targeted sequence in the  
118 genome of *C. glutamicum*. Successful re-integration was confirmed by colony-PCR  
119 and sequencing.  
120

### 121 2.3 Phage Propagation

122 The initial phage stock of CL31 was provided by the Félix d'Hérelle Reference  
123 Center for bacterial viruses of the Université Laval (Québec, Canada). To amplify  
124 the phage, *C. glutamicum* MB001 was inoculated to an OD<sub>600</sub> of 5 in 20 ml BHI  
125 medium, 7.5 µl CL31 lysate was added and the culture was incubated for 5 min at  
126 RT without shaking. Subsequently, the culture was filled-up to the final volume of  
127 100 ml to reach the final cultivation OD<sub>600</sub> of 0.5. This culture was then incubated at  
128 30°C and 120 rpm shaking frequency. When the culture was lysed completely (~ 4  
129 h), supernatants were harvested by centrifugation for 15 min at 4500 x g. The  
130 supernatants were sterile filtered (0.2 µm pore size), and the buffer was exchanged  
131 to sodium chloride/magnesium sulfate (SM) buffer (10 mM Tris-HCl pH 7.3, 100 mM  
132 NaCl, 10 mM MgSO<sub>4</sub>, 2 mM CaCl<sub>2</sub>) using Amicon Ultra Filter falcons with 30 kDa  
133 cutoff (MerckMillipore, Billerica, USA). The latter step was additionally used to  
134 concentrate the samples. Finally, the lysate was mixed with glycerol to a final  
135 concentration of 10% (w/v) and stored at -80°C until further usage.

### 136 2.4 Phage Purification with cesium chloride gradients

137 A further purification of the isolated phage particles was conducted as  
138 preparation for the proteomics measurements. For this purpose, cesium chloride  
139 (CsCl) was dissolved in SM buffer creating solutions of different densities (1.3, 1.4,  
140 1.5, 1.6 g/ml). These solutions were subsequently layered into a centrifuge tube with  
141 2 ml per density (with lowest density on top). 2 ml of pre-purified phage solution  
142 (in SM buffer) were added on top of this gradient and centrifuged in an  
143 ultracentrifuge at 150,000 x g and 4°C for 2 h.

144 During this centrifugation, a milky layer of phage particles appeared between  
145 the 1.3 g/ml and 1.4 g/ml layer. This milky layer was extracted, washed three times  
146 with SM buffer using Amicon Ultra centrifugal filters with 30 kDa cutoff  
147 (MerckMillipore, Billerica, USA) and subsequently tested for their phage titer.

### 148 2.5 DNA Isolation

149 The isolation of phage DNA was conducted as described by Hardy and  
150 colleagues [30]. To be more precise, 1 µL of 20 mg/mL RNase A and 1 U/µL DNase  
151 (Invitrogen, Carlsbad, CA, USA) were added to 1 mL of the filtered lysates to limit  
152 contamination by host nucleic acids. The suspension was incubated at 37° C for 30  
153 min. Subsequently, EDTA, proteinase K and SDS were added to the mixture at final  
154 concentrations of 50 mM (EDTA and proteinase K) and 1% SDS (w/v), respectively.  
155 The digestion mixture was incubated for 1 h at 56 °C, before adding 250 µL of  
156 phenol:chloroform:isopropanol. The content was thoroughly mixed before  
157 centrifugation at 16,000 x g for 4 min. The upper phase containing the DNA was  
158 carefully transferred to a clean microcentrifuge tube and 2 volumes of 100% ethanol  
159 were added as well as sodium acetate to a final concentration of 0.3 M. After  
160 centrifugation at 16,000 x g for 10 min, the supernatant was discarded, and the pellet  
161 washed with 1 mL 70% ethanol. Finally, the dried pellet was resuspended in 30 µL  
162 DNase-free water and stored at 4°C.

163 *2.6 DNA Sequencing and Genome Assembly*

164 The DNA library was prepared using the NEBNext Ultra II DNA Library Prep  
165 Kit for Illumina (New England Biolabs, Ipswich, MA, USA) according to the  
166 manufacturer's instructions and sequenced using the Illumina MiSeq platform with  
167 a read length of  $2 \times 150$  bp (Illumina, San Diego, USA). In total, 100,000 reads were  
168 subsampled, and de novo assembly as well as contig verification was performed  
169 using CLC genomics workbench 9.0 (QIAGEN, Hilden, Germany). The resulting  
170 genome displayed a ~4,600x average coverage.

171 *2.7 Gene Prediction and Functional Annotation*

172 Gene prediction and annotation was performed with slight modifications as  
173 described before by Hardy and colleagues [30]. Open reading frames (ORFs) in the  
174 phage genomes were identified using a combination of PHANOTATE v1.5.0 [31],  
175 GeneMark.hmm\_PROKARYOTIC v3.26 [32] and the ORF prediction function of  
176 SnapGene software (from Insightful Science; available at [snapgene.com](http://snapgene.com)).  
177 Functionally annotation was done using an automatic pipeline using multiphate  
178 v1.0 [33]. The functional annotation was automatically improved and curated using  
179 hidden Markov models (HMMs), and BLASTp [34] based similarity searches against  
180 different databases Prokaryotic Virus Orthologous Groups (pVOGs [35], NCBI viral  
181 proteins, and Conserved Domain Database CDD [36]), with the e-value cutoff  $10^{-10}$ .  
182 Additionally, BLASTp searches against NR database (e-value cutoff 0.05) and  
183 PhagesDB database [22] (e-value cutoff 1) were used to add broader information to  
184 the annotation table. The ends of the phage genome were determined with  
185 PhageTerm [37] using default parameters. The rearrangement of the CL31 genome  
186 based on the PhageTerm results showed an area that was not successfully resolved  
187 by the genome assembly. Thus, Sanger sequencing was used to further resolve this  
188 repeat-containing area (Figure S1). The annotated genome was deposited in  
189 GenBank under the accession number MW582634.

190 *2.8 Genomic distance analysis*

191 Genome-wide nucleotide k-mer frequency distribution was calculated across  
192 the complete > 2950 bacteriophage genomes using an approach based on machine  
193 learning in R [38,39]. Further details about code and methodology on  
194 [https://bioinformaticshome.com/bioinformatics\\_tutorials/R/phylogeny\\_estimation.html](https://bioinformaticshome.com/bioinformatics_tutorials/R/phylogeny_estimation.html).  
195 [html](https://bioinformaticshome.com/bioinformatics_tutorials/R/phylogeny_estimation.html).

196 The resulting frequency matrix was used to calculate the pairwise distance  
197 between the phage genomes with the Jensen-Shannon divergence method. The  
198 resulting distance matrix was used to display the genomic distance using a boxplot  
199 with ggplot2 package [40] in R.

200

## 201 2.9 Phage Classification

202 To establish the relationship between the newly sequenced CL31 phage with  
203 already known actinobacteriophage genomes, initially, we randomly selected the  
204 one representative phage genomes from each known group or cluster from the  
205 PhageDB [22]. A selected set of 31 phage genomes, including CL31, was used to  
206 calculate pairwise average nucleotide identity (ANI) using the python program  
207 pyani 0.2.9 [41] with the help of the ANIb method. The resulted average percentage  
208 identity matrix obtained from pyani was clustered and visualized using the R  
209 package ComplexHeatmap [42]. Additionally, pairwise intergenomic distances and  
210 similarities between the same set of Actinobacteriophage genomes were calculated  
211 using the VIRIDIC webserver [43].

## 212 2.10 Lifestyle prediction

213 We used a novel computational approach for actinobacteriophage lifestyle  
214 prediction based on counts of the set of specific genome-wide distributed conserved  
215 protein domain using a custom-designed R script. Initially, we identified the  
216 conserved protein domains from 2951 complete actinobacteriophage genomes  
217 against the CDD database [44] using RPSTBLASTN with e-value (0.001). The  
218 predicted protein domains from all these genomes were divided into two parts  
219 based on the known phage lifestyle (temperate and virulent) information. The list of  
220 protein domains specific to each corresponding lifestyle was collected and used as a  
221 base to classify new phage genomes. The first step in the classification process is  
222 identifying the protein domains from the individual phage genome (Ex: CL31) using  
223 RPS-TBLASTN. The identified protein domains were then mapped and counted  
224 against the base list of temperate and virulent specific domains. Finally, check the  
225 total number of the mapped particular protein domains within the individual  
226 genome and assign putative lifestyle based on the one which contains higher counts.

## 227 2.11 Phage Infection Curves and Titer Determination

228 The dynamics of CL31 infection were analyzed using bacterial growth  
229 (measured as OD<sub>600</sub>) and phage titer (measured with spot assays) for a time course  
230 of 24 h. Cultivations were conducted as described in 2.1. For shaking flask  
231 cultivations, an MOI of 0.1 was used and 1 ml samples were taken at the beginning  
232 of the cultivation (0 h), hourly up to 6 h and a final sample at 24 h after cultivation  
233 start. OD<sub>600</sub> of these samples was measured and after a 5 min centrifugation at 16,000  
234 x g and 4°C, the top 200 µl of the supernatant were diluted in SM buffer in a ten-fold  
235 series up to 10<sup>-8</sup>. Subsequently, 3 µl of each dilution were spotted on overlay agar  
236 plates with soft agar containing MB001 cells.

237 After an overnight incubation at 30°C, the phage titer could be determined by  
238 counting single plaques and calculating the plaque forming units (PFU) per ml.

239



## 240 2.12 Transcriptome Analysis (RNA-seq)

### 241 2.12.1 Sample preparation and sequencing

242 For RNA sequencing, MB001 as well as WT cells were cultivated in shake flasks  
243 as described in 2.1. In addition to CL31-infected samples, we cultivated the strains  
244 also without CL31 as controls. Samples were extracted at 0, 0.5, 0.75, 1, 1.5 and 2 h  
245 after cultivation start (5 ml for RNA preparation, and 1 ml for OD<sub>600</sub> measurement  
246 and phage titer determination). Phage titers were determined as described before  
247 and a time point before titer increase was chosen for RNA preparation. This  
248 preparation was conducted with the Monarch Total RNA Miniprep Kit (New  
249 England Biolabs) following the manufacturer's instructions.

250 Subsequently, ribosomal RNA was depleted using NEBNext rRNA Depletion  
251 Kit (Bacteria) (New England Biolabs) with additional organism-specific spiked-in  
252 custom probes following the manufacturer's protocols. RNA quality was  
253 determined before and after rRNA depletion using a TapeStation 4200 (Agilent  
254 Technologies Inc, Santa Clara, USA).

255 In a next step, the fragmentation of RNA, cDNA strand synthesis and indexing  
256 were carried out using the NEBNext® Ultra™ II Directional RNA Library Prep Kit  
257 for Illumina® (New England Biolabs) according to the supplier's manual. The  
258 resulting cDNA was purified using Agencourt AMPure XP magnetic beads  
259 (Beckman Coulter, IN, USA) and libraries were quantified using the KAPA library  
260 quant kit (Peqlab, Bonn, Germany) and normalized for pooling. Pooled libraries  
261 were sequenced on a MiSeq (Illumina, CA, USA) using the MiSeq Reagent Kit v3 to  
262 generate single-end reads with a length of 150 bases. Base calling and preprocessing  
263 were conducted with the Illumina instrument software and stored as fastq output  
264 files.

### 265 2.12.2 Bioinformatic transcriptome analysis

266 The quality of the sequencing reads was analyzed using FastQC  
267 (<https://www.bioinformatics.babraham.ac.uk/projects/fastqc/>). Because of good  
268 quality and absence of significantly over-represented (adapter) sequences, no  
269 further pre-processing was undertaken.

270 Further read analysis was conducted using CLC genomic workbench V. 10.1.1  
271 software (QIAGEN, Hilden, Germany). The reads were mapped against the *C.*  
272 *glutamicum* genomes (Accession BX927147.1) and the CL31 genome and transcripts  
273 per million (TPM) values were calculated using the RNA-seq analysis tool of CLC  
274 genomics workbench using the following read alignment parameters: Mismatch  
275 cost: 2, Insertion cost: 3, Deletion cost: 3, Length fraction: 0.8, Similarity fraction: 0.8,  
276 Strand specific: both, Maximum number of hits for a read: 10. Subsequently, a TPM  
277 value table was exported and further processed by calculation of inter-replicate  
278 means and variances (expressed as a percentage of the relative difference between  
279 single replicate values). Furthermore, a fold-change was calculated based on each  
280 mean value.

## 281 2.13 Staining of CL31 for Fluorescence Microscopy

282 In order to visualize CL31 particles using fluorescence microscopy, 500  $\mu$ l phage  
283 solution were mixed with 50  $\mu$ l SYBR Gold (Invitrogen, Carlsbad, USA), diluted  
284 1:1000 with SM buffer. After an incubation at 4°C in the dark for 1 h, the samples  
285 were transferred to an Amicon Ultra centrifugal filter falcon with 30 kDa cutoff  
286 (MerckMillipore, Billerica, USA). The sample were washed three times with 10 ml  
287 SM buffer, using centrifugation steps of 10 min and 4,000 rpm in a swinging rotor.  
288 After the washing steps, remaining 500  $\mu$ l were collected and kept in a dark tube at  
289 4°C until further use.

290 Bacterial cells were stained using SM buffer containing 100 ng/ml Hoechst 33342  
291 and 250 ng/ml Nile red. For this purpose, a sample was taken out of an exponentially  
292 growing culture (OD<sub>600</sub> ~3, cultivation as described before), washed with SM buffer  
293 and resuspended in the SM buffer containing Hoechst 33342 and Nile red. After a 15  
294 min incubation at room temperature, cells were pelleted using centrifugation and  
295 resuspended in fresh SM buffer.

296 Stained bacterial cells and stained phages were mixed together with a high MOI  
297 (~100) and directly analyzed using a Zeiss M2 imager fluorescence microscope.

## 298 2.14 Scanning electron microscopy.

299 For scanning electron microscopy (SEM), bacteria were fixed with 3% (vol/vol)  
300 glutaraldehyde (Agar Scientific, Wetzlar, Germany) in PBS for at least 4 h, washed  
301 in 0.1 M Soerensen's phosphate buffer (Merck, Darmstadt, Germany) for 15 min, and  
302 dehydrated by incubating consecutively in an ascending acetone series (30%, 50%,  
303 70%, 90%, and 100%) for 10 min each and the last step thrice. The samples were  
304 critical point dried in liquid CO<sub>2</sub> and then sputter coated (Sputter Coater EM  
305 SCD500; Leica, Wetzlar, Germany) with a 10-nm gold/palladium layer. Samples  
306 were analyzed using an environmental scanning electron microscope (ESEM XL 30  
307 FEG, FEI, Philips, Eindhoven, Netherlands) with a 10-kV acceleration voltage in a  
308 high-vacuum environment.

## 309 2.15 Proteome analysis

### 310 2.15.1 Sample preparation for proteome analyses

311 For the proteome analysis, propagated and CsCl-purified CL31 phages were  
312 used (described before). These phages were either pre-analyzed with SDS-PAGE  
313 [45] using a 4–20% Mini-PROTEAN® gradient gel (Bio Rad, Munich, Germany), or  
314 used directly for whole phage digestion.

### 315 2.15.2 In-gel digestion

316 The de-staining and tryptic digestion of protein bands in gel slices was carried  
317 out in combination with the Trypsin Singles, Proteomics Grade Kit (Sigma-Aldrich)  
318 as previously described by Lavigne and colleagues [46]. The StageTipping desalting  
319 step was carried out as described elsewhere [47,48]. The tryptic peptide samples  
320 were stored at -20°C until use for MS measurements.

### 321 2.15.3 Digestion of Whole Phage Particles

322 The digestion of whole phage particles ( $1 \times 10^{10}$  PFU) were carried out as  
323 previously described by Lavigne and colleagues [46]. The StageTipping desalting  
324 step was carried out as described elsewhere [47,48]. The sample was dried and  
325 resuspended in 30  $\mu$ L solvent A ( $H_2O + 0.1\%$  formic acid).

### 326 2.16 LC separation and mass spectrometry

#### 327 2.16.1 Shotgun proteomic measurement

328 The prepared tryptic peptide samples were separated chromatographically on a  
329 nanoLC Eksigent ekspert™ 425 LC system in microLC modus (Sciex) with a 25  
330 Micron ESI Electrode coupled to a TripleTOF™ 6600 mass spectrometer (Sciex). As  
331 the trap, a YMC-Triart C18 capillary guard column with the dimension 5 x 0.5 mm  
332 ID, 12 nm, S-3  $\mu$ m, was used. The analytical column was an YMC-Triart C18 column  
333 with 150 x 0.3 mm ID, 12 nm, S-3  $\mu$ m (YMC). The column oven was set to 40 °C.

#### 334 2.16.2 Trapping conditions

335 The loading solvent was 2% acetonitrile in water with 0.5% formic acid. For the  
336 IDA (Information Dependent Acquisition) = DDA (Data dependent analysis)  
337 measurements, 8  $\mu$ L or 10  $\mu$ L of the desalted samples were loaded onto the trap  
338 column using 100% loading solvent for 3 minutes at 10  $\mu$ L/min for desalting and  
339 enrichment.

#### 340 2.16.3 Separation conditions

341 The solvent used for mobile phase A was water with 0.1% formic acid and the  
342 mobile phase B was acetonitrile with 0.1% formic acid (both LC-MS grade,  
343 ROTISOLV®,  $\geq 99.9\%$ , Carl Roth). The separation of the peptides followed on the  
344 analytical column with a linear gradient with increasing concentration of mobile  
345 phase B. The initial conditions were 97% A and 3% B at a flow rate of 5  $\mu$ L/min. The  
346 linear gradient used was 3% - 25% B in 38 minutes. Within the following 5 minutes,  
347 the mobile phase B was increased to 32% and was further increased to 80% within 2  
348 min, lasting for 3 minutes. At minute 49, the mobile phases were changed to the  
349 initial condition with 97% A and 3% B within 8 min.

#### 350 2.16.4 IDA-MS

351 The source and gas settings were 5500 V Ionspray voltage, 35 psi curtain gas,  
352 12 psi ion source gas 1, 20 psi ion source gas 2 and 150°C interface heater.

353 For shotgun measurements the mass spectrometer was operated in positive  
354 mode with a "top 50" method: Initially, a 250 ms survey scan (TOF-MS mass range  
355 m/z 400-1250), was collected from which the top 50 precursor ions were  
356 automatically selected for fragmentation, whereby each MS/MS event (mass range  
357 m/z 100-1500, in high sensitivity mode) consisted of a 50 ms fragment ion scan. The  
358 main selection criterion for parent ion selection was precursor ion intensity. Ions

359 with an intensity exceeding 150 counts per second and with a charge state of +2 to  
360 +5 were preferentially selected. Those precursors were added to a dynamic exclusion  
361 list for 15 s. Precursor ions were isolated using a quadrupole resolution of 0.7 amu  
362 and fragmented in the collision cell with a rolling collision energy of 10 eV. If less  
363 than 50 precursor ions fulfilling the selection criteria were detected per survey scan,  
364 the detected precursors were subjected to extended MS/MS accumulation time to  
365 maintain a constant total cycle time of 2.8 s.

#### 366 2.16.5 Data analysis

367 The IDA data were processed with ProteinPilot™ (5.02, Sciex) using the  
368 Paragon™ algorithm for protein identification. This data was then compared with a  
369 database using a protein FASTA file of *C. glutamicum* ATCC 13032 and predicted  
370 protein sequences of the phage CL31.  
371

## 372 3. Results

### 373 3.1 Genome assembly, annotation and comparisons

374 The corynepophage CL31 was already characterized with regard to its structure  
375 and restriction map in 1987 by Annie Trautwetter and colleagues [21]. In this study,  
376 we set out to further characterize this Siphovirus and its interaction with the  
377 biotechnological platform strain *C. glutamicum* ATCC 13032.

378 Genome sequencing and assembly revealed that CL31 harbors a 45,061 bp  
379 dsDNA genome with an average GC-content of 54.4% (Figure 1A). Using the  
380 bioinformatics tool PhageTerm, the termini of CL31 were identified as being  
381 cohesive ends with a 16 bp 3' overhang (CCCCACTCGGCCACG)[37]. Genome  
382 annotation revealed 72 genes encoded by the CL31 genome (Figure 1A and Table  
383 S3). While nearly half of the discovered genes encode proteins of unknown function  
384 (34/72), a putative function could be assigned to the rest of the CL31 proteins( Figure  
385 1B). A main group consists of genes encoding phage structural proteins (clg52 –  
386 clg72). Together with phage lysis genes (clg49 – clg51), this group represents a major  
387 proportion of all coding sequences on the CL31 genome (Figure 1A). Besides these  
388 phage-related genes, CL31 also encodes two “diverse” sets (clg01 – clg28 and clg29  
389 – clg48) of genes that mainly consist of genes related to DNA replication, repair,  
390 recombination and degradation as well as with amino acid transport and  
391 metabolism. While the first diverse set is solely encoded on the minus strand, the  
392 second set is encoded on the plus strand of CL31.

393 Interestingly, during genome assembly an area was discovered showing  
394 uncertain read mapping properties and reads that only partly mapped inside the  
395 gene clg55 encoding a putative minor tail protein (data not shown). To discover the  
396 origin of this mapping conflict, we used a primer pair flanking the particular  
397 genomic region to perform PCRs on single plaques and Sanger sequencing to resolve  
398 the correct sequence of this area (Figure S1). Remarkably, different plaques led to  
399 different sizes of the PCR products suggesting that this area could be variable within  
400 the phage population. In line with this observation, Sanger sequencing revealed the  
401 occurrence of three different lengths of a repeat area inside the gene clg55 (Figure 1  
402 C and Figure S1). The three exemplary plaques picked contained - as schematized in  
403 Figure 1C - either four, six or eight repeats inside of clg55. These repetitive areas  
404 consist of single elements of 42 bp minisatellites, spanning 14 amino acids. In case of  
405 the four or eight repeat variants, the second microsatellite differs from the others  
406 because of a codon exchange (AAA to CAG), shown in Figure 1 C in light grey.

407 Pairwise comparison of the CL31 genome against 2955 previously described  
408 different actinophage genomes was performed to describe the distance between  
409 CL31 and other phages (Figure 1D). This analysis confirmed that CL31 features the  
410 highest similarity to other *Corynebacterium* phages followed by phages infecting  
411 species of the genus *Gordonia*, *Mycobacterium* and *Arthrobacter* (Figure 1D and Table  
412 S4). An ANI-based distance matrix (Figure 1E) showed that the most similar phage  
413 to CL31 is the temperate corynepophage  $\Phi$ 16 [9,11]. Another corynepophage showing  
414 low similarity to CL31 is the lytic phage  $\Phi$ 673 [14], but no clustering was detectable

415 with other exemplary phages of each cluster (clustering according to phagesDB,  
416 based on [49]).

417

418

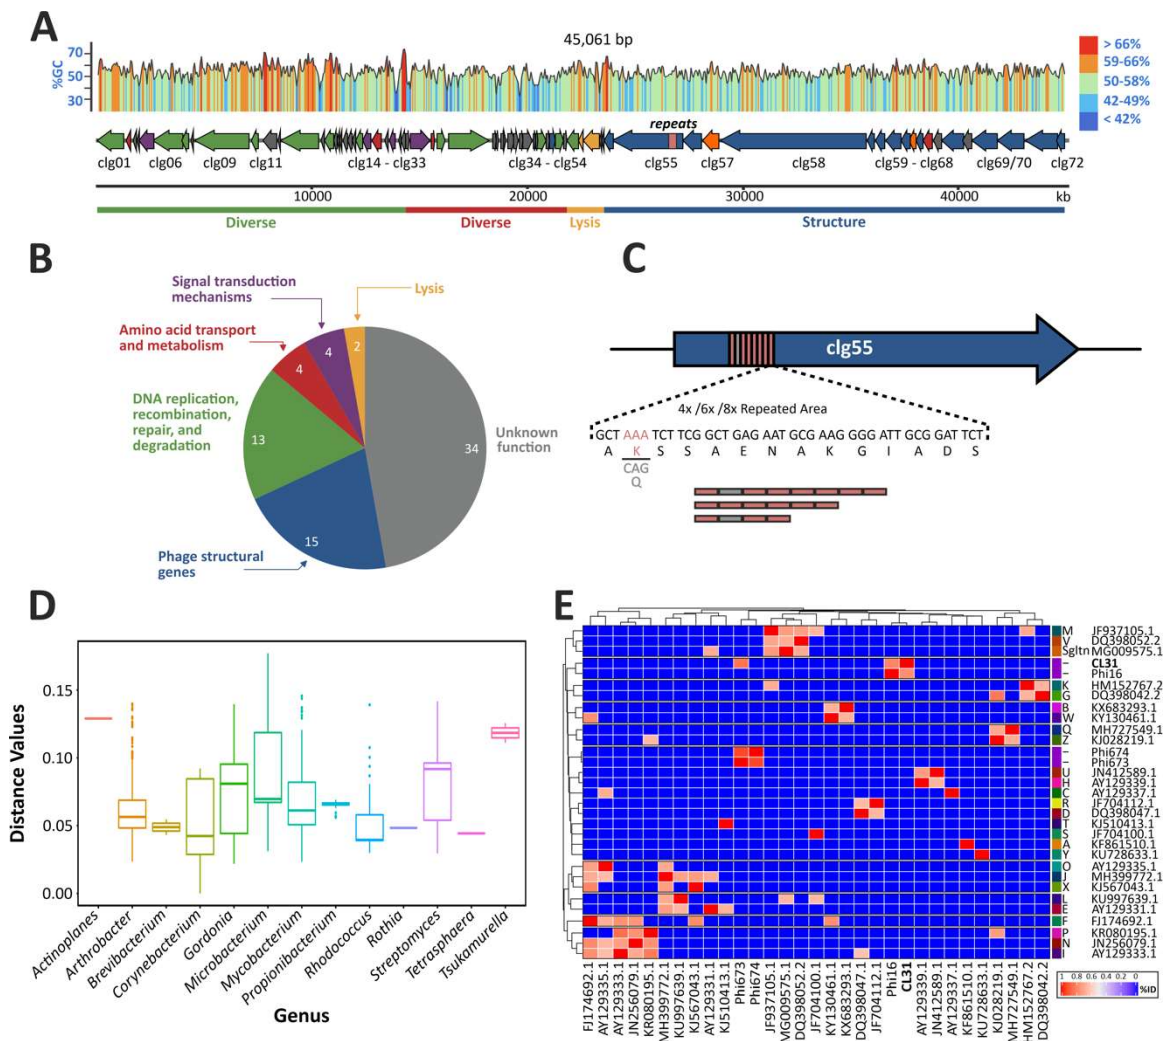

419

420

421

422

423

424

425

426

427

428

429

**Figure 1:** Genome analysis of the coryneophage CL31. (A) The genome of CL31 was assembled based on a combination of Illumina sequencing and Sanger sequencing. ORF prediction was done using Phanotate, GeneMark and SnapGene. The annotation and functional categorization (B) are based on multiphate as well as BLASTp against nr database and the PhagesDB database (phagesdb.org). (C) The gene clg55 contains a variable repeat region consisting of 42 base pair minisatellites. This region could not be assembled using formerly described assembly methods but was resolved by Sanger sequencing. (D) Pairwise distance between CL31 and >2950 phage genomes based on the Jensen-Shannon divergence method (E) Heatmap representing an average nucleotide percentage identity matrix with distances obtained using PYANI with the BLAST (ANiB) method based on a selected set of 31 phage genomes, including CL31.

430

### 3.2 Plaque morphologies and infection dynamics of CL31

431

432

433

434

435

436

In the following, we investigated the plaque morphology and infection dynamics of CL31 on different *C. glutamicum* strains. A first set of experiments revealed that CL31 showed the most efficient propagation when infecting the prophage-free *C. glutamicum* ATCC 13032 derivative MB001 (designated as MB001 in the following). In comparison, the WT strain ATCC 13032 lead to an EOP of  $1.7 \cdot 10^{-6}$  and the same strain lacking the restriction modification system CgIIM-CgIIR-

437 CgIIIR ( $\Delta resmod$ ) to an EOP of 0.63. A magnified view on plaques appearing on a  
438 MB001 lawn with CL31 revealed the occurrence of two distinct types of plaques: on  
439 the one hand slightly bigger and turbid ones, and on the other hand smaller plaques  
440 with a clear center and rougher border (Figure 2A). While CL31 was predicted to be  
441 a temperate phage (Table S6), the appearance of clear plaques could hint on the  
442 generation of lytic mutants that lost the ability to form lysogens with the host strain.  
443 Infection assays in liquid cultures were performed in shaking flasks to monitor  
444 the amplification of phage titer (Figure 2B) as well as in a Biolector microcultivation  
445 system (Figure 2C and 2D). For all tested strains, an initial decrease in phage titer is  
446 visible up to 1 h after start of the cultivation. Because the titer determination is based  
447 on free phages in the medium, this decrease probably reflects the adsorption of the  
448 free phage virions to the host cells. In this assay, no significant amplification of CL31  
449 was observed for the wild type strain. In contrast to this, the  $\Delta resmod$  strain as well  
450 as the prophage-free strain MB001 showed an increase in phage titer starting already  
451 after 2 h. Independently of the starting MOI, both strains reached a maximum titer  
452 of  $10^{12}$  PFU/ml (Figure 2B and Figure S2). Remarkably, phage amplification was  
453 clearly delayed in *C. glutamicum*  $\Delta resmod$  in comparison to strain MB001 (maximum  
454 in titer after 4 versus 3 hours, respectively). This altered infection dynamics is also  
455 reflected by the growth of the different strains in the presence and absence of phages:  
456 While *C. glutamicum* wild type was only slightly affected in growth with the highest  
457 MOI of 10, strains  $\Delta resmod$  and MB001 already displayed strong growth defects at  
458 an MOI of 0.05. Analogously to the delayed increase of phage titer in shake flask  
459 experiments of observed for *C. glutamicum*  $\Delta resmod$ , growth of strain MB001  
460 plateaued significantly earlier (Figure 2C and 2D). Independently of the used MOI,  
461 both sensitive strains ( $\Delta resmod$  and MB001) showed resumed growth after  
462 approximately 30 hours after infection probably hinting at the presence and growth  
463 of CL31-resistant clones or the formation of lysogens (Figure 2C).

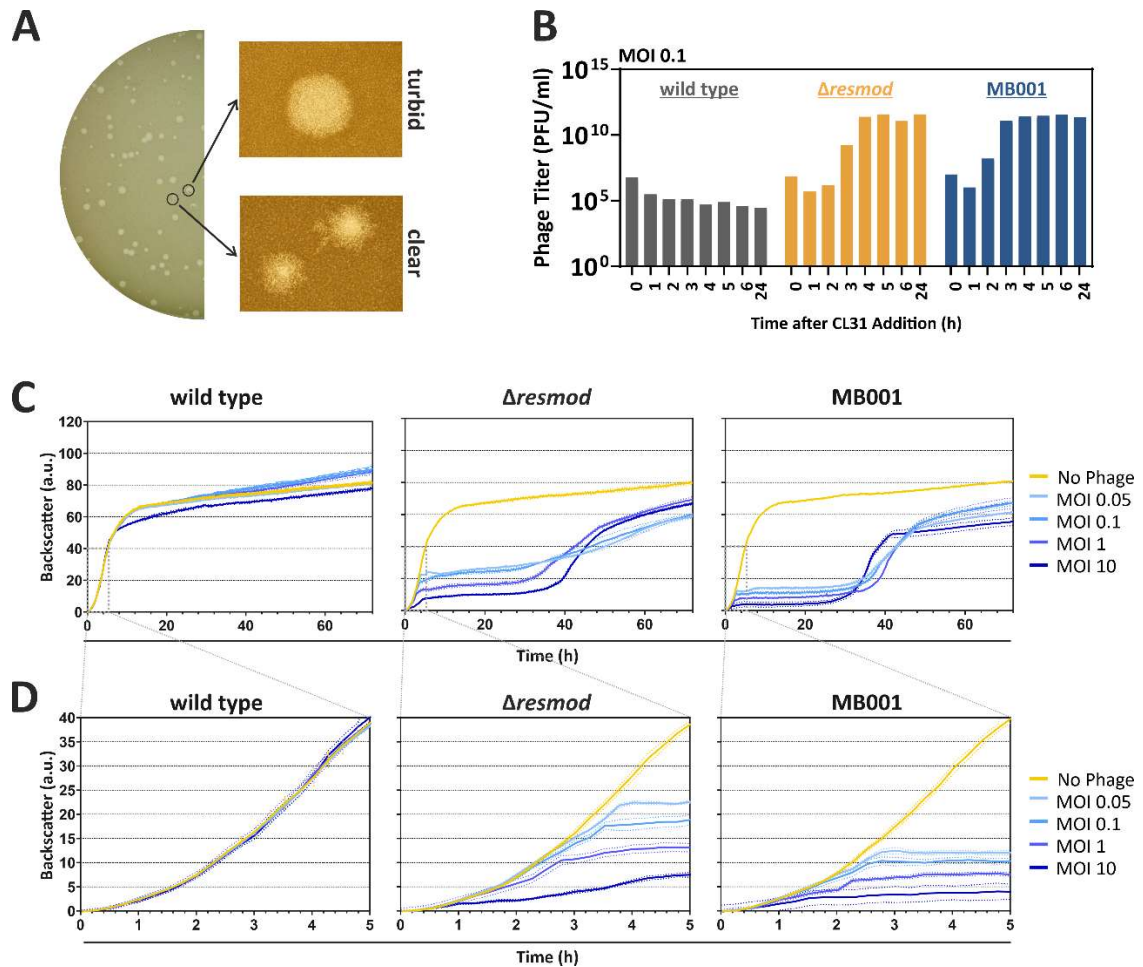

464

465

466

467

468

469

470

471

472

473

474

Figure 2: Plaque morphology and infection dynamics of CL31. (A) MB001 cells ( $OD_{600}$  0.5) were mixed with 10  $\mu$ l CL31 phages (stock diluted to  $10^{-9}$ ) in an overlay agar. After overnight incubation, plates were imaged using a Nikon SM-18 stereomicroscope. (B) Infection assay of CL31 with different host strains was used to determine the phage titer at different time points of incubation. For this purpose, bacterial cells were incubated with CL31 in BHI medium applying an initial MOI of 0.1. At the described time points, samples were taken and 3  $\mu$ l of the centrifuged supernatant were spotted on a MB001 lawn ( $OD_{600}$  0.5); plaques were quantified after overnight incubation (see also Figure S2). (C) Growth of different *C. glutamicum* host strains infected with different MOIs of CL31 using a BioLector microcultivation system. All data represent mean values with standard deviations from three independent biological triplicates ( $n=3$ ). (D) Zoom into the first 5 hours of cultivation shown in (C).

475

### 3.3 Visualization of CL31 attachment and lysis

476

477

478

479

480

481

482

483

484

485

486

Fluorescence microscopy (Figure 3A) and scanning electron microscopy experiments (Figure 3B) were used to visualize attachment and CL31-induced lysis of strain *C. glutamicum* MB001. To this means, phage particles were stained using the nucleic-acid stain SYBR Gold (Figure 3A). In addition, host cell membranes were stained using Nile red; the nucleoid was visualized using Hoechst 33342. After adding phages to a fresh culture of host cells, pictures were taken with a fluorescence microscope. Figure 3A clearly shows the occurrence of green foci on the bacterial surface, which hints on the attachment of stained CL31 phages to the bacteria. Free phages were also detectable in the surroundings of the bacterial cells. In addition to the surface-attached signals and the free phage particles, a green staining of the host chromosome was detectable. This signal, however, likely results from a carryover of



487 the SYBR Gold stain, since it was detected immediately after addition of the phage  
488 sample.

489 The scanning electron microscopy images (Figure 3B) was further used to  
490 visualize phage-induced cell lysis. After one hour, cells infected with CL31 showed  
491 a disintegrated cell morphology and bubbles on the cell surface indicating the start  
492 of cellular lysis.

493  
494

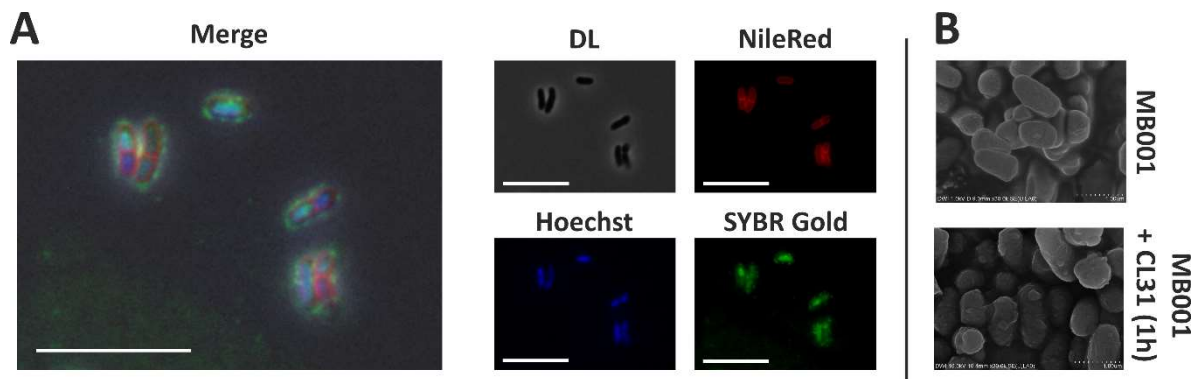

495

496 Figure 3: Visualization of CL31 attachment and host lysis. (A) Fluorescence microscopy of  
497 *C. glutamicum* MB001 cells stained with Nile red and Hoechst 33342, mixed with SYBR Gold stained  
498 CL31 phages. The bacterial cells and phages were mixed with a high MOI (~100) and directly analyzed  
499 using a Zeiss M2 imager fluorescence microscope. (B) Scanning electron microscopy images taken  
500 from *C. glutamicum* MB001 cells without (top) and with (bottom) CL31 phages. Bacterial cells and  
501 phages were mixed with an MOI of 1.2 and incubated for 1 h at 30°C and 120 rpm in BHI medium.

#### 502 3.4 Global transcriptome of *C. glutamicum* during infection with CL31

503 To assess global changes on the level of the transcriptome, we conducted an  
504 RNA-seq analysis with infected and uninfected *C. glutamicum* wild type and MB001  
505 (Figure 4 and Figure S3). Successful infection was confirmed by monitoring growth  
506 and plaque-forming units (Figure S3A). To cover the time point of highest  
507 intracellular phage activity, we decided to analyze the transcriptome of the samples  
508 taken 1 h after infection. At this time point, the amount of extracellular phage  
509 particles was the lowest before the titer increased again after 1.5 hours (Figure S3B).  
510 A comparison of the read origin of all tested samples shows the distribution of all  
511 reads to either host genes, genes inside of the CGP3 prophage or CL31 genes (Figure  
512 4A). As both of the tested strains contain a similar fraction of host genes, the  
513 distribution is equal in this case. For CGP3, however, only the wild type strain shows  
514 a high signal, because this prophage region was deleted in MB001. In line with the  
515 above-described experiments, CL31 transcripts could only be detected for MB001.

516 This effect is further underlined by a comparison of the transcriptional  
517 correlation of both infections (Figure 4B). While no strong differences are detectable  
518 in case of wild type with and without CL31 infection, the transcriptome of *C.*  
519 *glutamicum* MB001 differed significantly when infected and uninfected samples  
520 were compared (Figure 4B). Furthermore, a strain-dependent difference is  
521 detectable between uninfected wild type and MB001 cells.

522 The analysis of CL31-derived transcripts (Figure 4C) showed a strong  
 523 transcription of genes located on the minus strand (especially clg49-clg72) but only  
 524 slight signals from the plus strand (clg24-clg48). The majority of CL31 genes  
 525 transcribed at 1 h after infection mapped to genes encoding structural components  
 526 of the viral particles as well as lysis proteins (Figure 4C and Table S5). This suggests  
 527 a late infection state where new phage particles are already assembled and  
 528 expression of clg51 (lysine) and clg50 (holin) will initiate cell lysis. Besides structural  
 529 and lysis genes, the highest transcription was observed for a Xre-/Cro-like repressor  
 530 gene (clg26). However, all genes surrounding clg26 are either not transcribed or only  
 531 at lower levels. Table S5 shows further that only 8/72 genes do not show any  
 532 transcription at this time point. This covers the genomic regions from clg27 to clg39  
 533 where genes are mainly located on the plus strand of CL31. Except a potential  
 534 antirepressor protein (clg30) and a peptidase (clg31), all of these non-transcribed  
 535 genes code for hypothetical proteins (cp. Table S3).

536 Taking together, the transcriptome analysis revealed a successful infection of  
 537 MB001 but not of the wild type, which is in agreement with the infection curves  
 538 showing no significant amplification of CL31 in *C. glutamicum* WT cells.  
 539

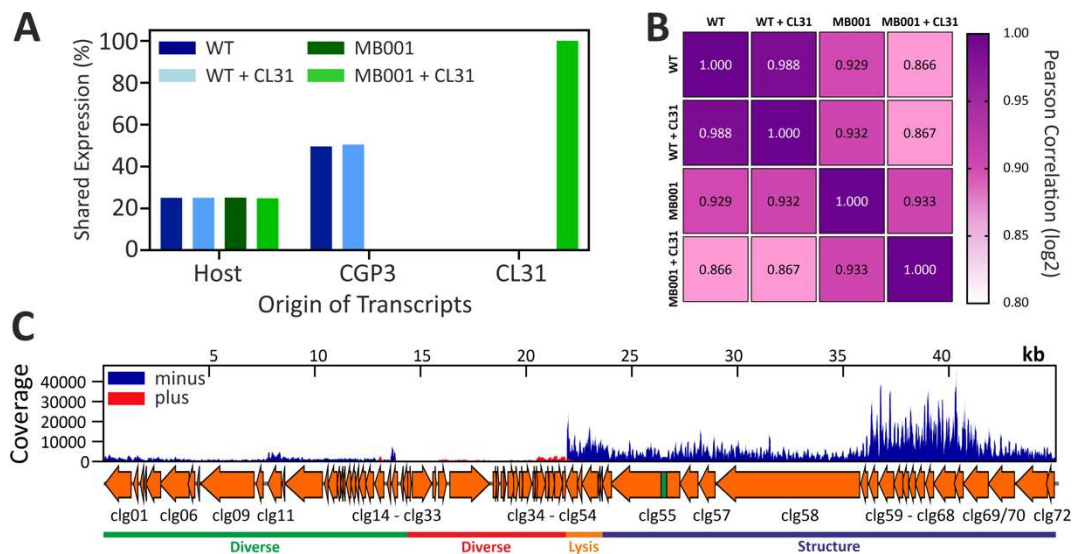

540  
 541 Figure 4: Transcriptome analysis of CL31-infected *C. glutamicum* strains. (A) The origin of transcripts is  
 542 displayed as relative part of each sample. It was divided into transcripts from the host, from the CGP3  
 543 prophage element of the host or into transcripts from the CL31 phage. Bars represent mean values of two  
 544 replicates. (B) Pearson correlation was calculated based on the Log<sub>2</sub> of the TPM values of each experiment.  
 545 (C) Transcription profile of the CL31 phage infecting *C. glutamicum* MB001. Bacterial cells and phages were  
 546 mixed with an MOI of 0.1 and incubated in BHI medium at 30°C and 120 rpm. The coverage shows one  
 547 representative sample. A detailed sampling is shown in Figure S3 and detailed analysis is represented by  
 548 Table S5.

549 In addition to the CL31-derived transcripts, aim of our analyses was the host  
 550 reaction towards infection with this phage. Table S5 contains – in addition to the  
 551 CL31 transcriptome - the whole transcriptomes of both MB001 and the WT strain.  
 552 As a reaction to the CL31 addition, the expression of 156 genes in total was more  
 553 than 2-fold up or down regulated (Table S5), while in MB001 expression of 122 genes  
 554 are affected.

555 In the case of *C. glutamicum* WT infection, genes affected by CL31 infection  
556 belong to diverse functional groups including genes involved in transport and  
557 metabolism (carbon sources, ions, and metabolites), DNA replication and  
558 metabolism, or signal transduction mechanisms. Interestingly, 23% of the  
559 upregulated and 18% of the downregulated genes are located within the CGP3  
560 region. The highest upregulated gene of the CGP3 region is cg1988 (5.6-fold  
561 upregulated) encoding a putative transcriptional regulator with similarities to a  
562 phage immunity repressor protein. Additionally, the neighbouring gene cg1989,  
563 which shows similarities to a metallopeptidase, is also upregulated during CL31  
564 infection (cp. Table S5).  
565

### 566 3.5 Structural proteome analysis of purified CL31 virions

567 A significant fraction of CL31 CDSs on the minus strand encodes proteins  
568 potentially serving as structural components of the CL31 virion. To confirm the  
569 presence of these protein in the phage particle, CL31 virions were purified using  
570 CsCl-gradient centrifugation. Samples were analysed by SDS-PAGE as well as mass-  
571 spectrometry analysis of denatured phage particles (Figure 5). The combined results  
572 from both approaches are depicted in Figure 5C.

573 As expected, the majority of detected proteins could be attributed to the group  
574 of structural proteins. Two exceptions are represented by Clg13 (RecB-like  
575 exonuclease) and Clg51 (lysin) (Figure 5C). However, these proteins were found in  
576 minor fractions and might be remnants of the cell lysis. Overall, the identified  
577 structural protein components nicely correspond to the composition of a full phage  
578 particle. The phage tail structure is likely composed of the minor tail proteins Clg55  
579 and Clg56, the tape measure protein Clg58 and the major tail protein Clg61, while  
580 the phage capsid consists of the major capsid protein Clg67. Major tail and major  
581 capsid proteins (Clg67 and Clg61) were also detected as clear bands on the SDS-  
582 PAGE (Figure 5A). Additionally, several further phage structure proteins could be  
583 identified at lower abundances. These included a tail terminator protein (Clg62), a  
584 head-to-tail connector protein (Clg64), a capsid maturation protease (Clg69) and a  
585 portal protein (Clg70). Other proteins found and encoded in the structural protein  
586 part of CL31 are Clg65 (put. cell-wall associated hydrolase) and several hypothetical  
587 proteins of unknown function.

588

589

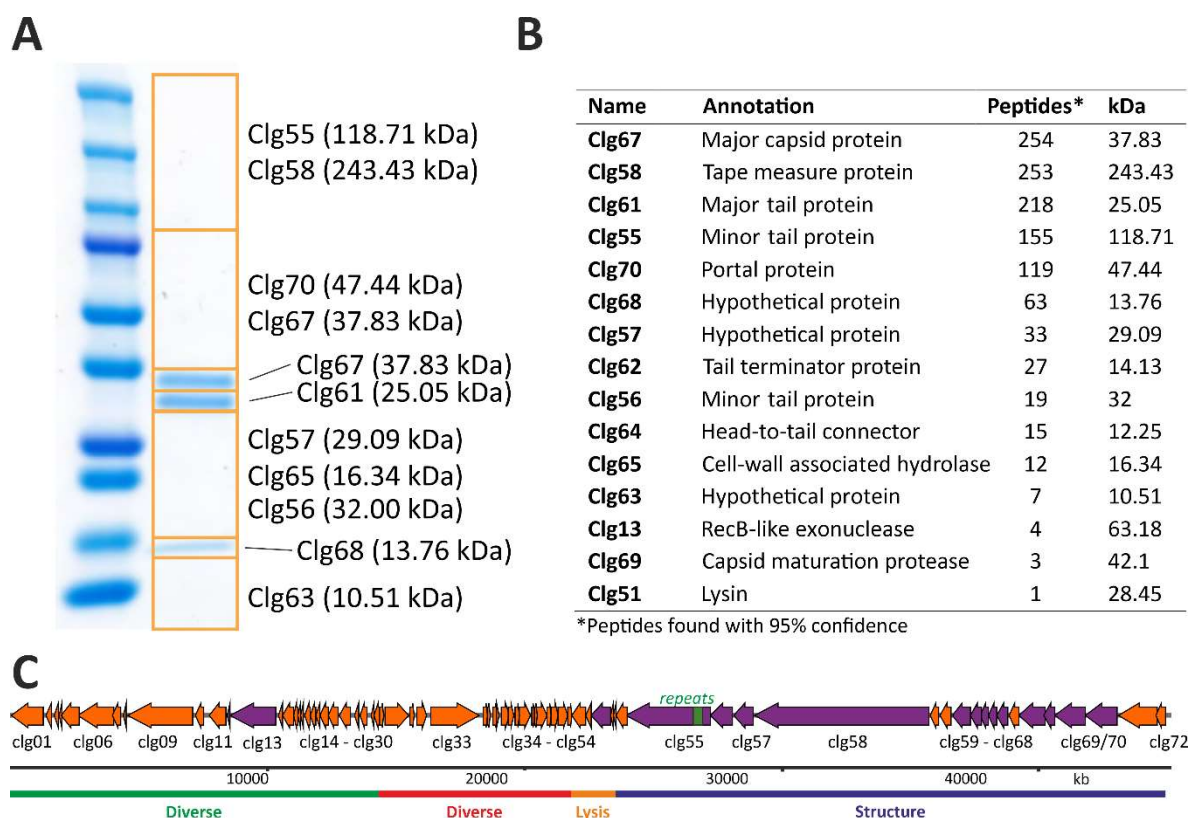

590

591

592

593

Figure 5: Analysis of the structural proteins of CL31 using SDS-PAGE and mass spectrometry. (A) SDS-PAGE of CL31 phage particles purified with CsCl-gradient centrifugation. (B) LC/MS analysis of whole phage particles. (C) Comprehensive scheme of all proteins found (purple) in (A) and (B).

594

595

### 3.6 Mutations in genes involved in mycolic acid biosynthesis lead to resistance to infection by CL31

596

597

598

599

600

601

602

603

604

605

606

607

608

609

610

611

612

613

614

A prolonged incubation of *C. glutamicum* host cells gave rise to a cell population able to grow in the presence of phages after ~30 h. Interestingly, isolation of clones surviving phage infection showed an altered colony morphology after the cultivation (Figure 6A). While WT cells showed a homogeneous and smooth colony surface structure, survivors of CL31 infection displayed a rough and uneven colony surface. Resistance of isolated clones obtained from all three *C. glutamicum* strains (wild type,  $\Delta$ resmod and MB001) was first verified using spot assays (Figure 6B). To identify causal mutations conferring resistance to phage infection, we performed genome sequencing of single phage-resistant clones. Genome sequencing of all three clones was conducted, followed by an identification of single nucleotide polymorphisms (SNPs) using the bioinformatics tool Snippy [50]. As shown in Table 2, in comparison to the parental strains (*C. glutamicum* ATCC 13032, accession: BX927147 or *C. glutamicum* MB001, accession: CP005959), each of the survivors showed only one SNP. All SNPs caused missense mutations leading to an amino acid exchange of either glycine or tyrosine to aspartic acid (Table 2) and were found in genes relevant for the biosynthesis of mycolic acid in *C. glutamicum*. Two mutations were found in *accD2* and *accD3* encoding subunits of a acyl-CoA carboxylase complex [51]. The third mutation was identified in *pks*, encoding a polyketide synthase. All three gene products were previously described to share

615 important functions in precursor supply for mycolic acid biosynthesis [51]. As a  
616 verification of the resistance phenotype caused by the mutations, all found  
617 mutations were re-integrated in the most sensitive strain – MB001. Spot assays of  
618 CL31 on lawns of the isolated mutant strains as well as strains carrying the re-  
619 integrated single SNPs confirmed an almost complete resistance of the respective  
620 strains towards CL31 infection (Figure 6C).  
621

622 **Table 2:** SNP analysis using the bioinformatic tool Snippy [50] was used to discover mutations in  
623 different *C. glutamicum* strains showing resistance towards CL31 infection.

| Strain          | Reference | Gene                             | Locus  | Base   | Amino Acid | Position | Frequency | Mutation |
|-----------------|-----------|----------------------------------|--------|--------|------------|----------|-----------|----------|
| $\Delta$ resmod | BX927147  | <i>dtsR2</i><br>( <i>accD2</i> ) | Cg0811 | C -> T | Gly350Asp  | 728777   | 97.7 %    | missense |
| MB001           | CP005959  | <i>pccB</i><br>( <i>accD3</i> )  | Cg3177 | C -> T | Gly341Asp  | 2831759  | 95.4 %    | missense |
| WT              | BX927147  | <i>pks</i>                       | Cg3178 | A -> T | Tyr886Asp  | 3038431  | 100 %     | missense |

624  
625

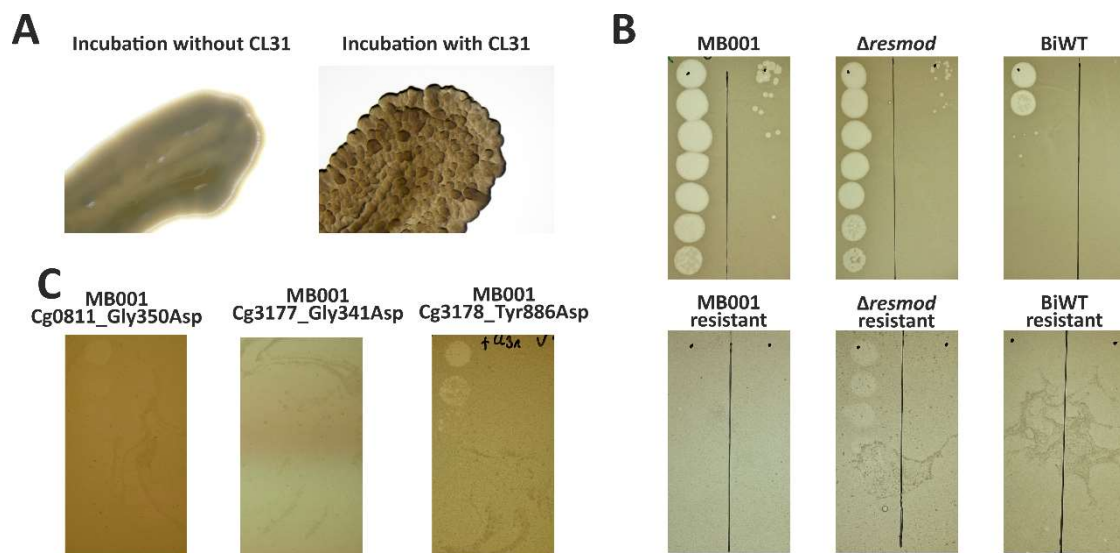

626

627 Figure 6: SNPs in genes involved in mycolic acid biosynthesis confer resistance to CL31 infection. (A)  
628 Colony surface of *C. glutamicum* WT (left) and a clone isolated after CL31 infection (right). For details  
629 on the isolation, see material and methods. (B) *C. glutamicum* clones isolated after CL31 were used to  
630 inoculate an overlay agar and perform phage titer determination with a serial dilution of CL31. As  
631 controls, the corresponding origin strains were treated similarly (top row). Representative examples  
632 out of three replicates are shown. (C) A similar titer determination as described in B was conducted  
633 with *C. glutamicum* strains harboring a reintegration of the SNPs (Table 1) found in the resistant *C.*  
634 *glutamicum* strains.

635

#### 636 4. Discussion

637 The present study provides a comprehensive analysis of the genomic features of  
638 phage CL31 and the infection of the host strain *C. glutamicum* ATCC 13032. While  
639 the infection of the WT strain ATCC 13032 was only poorly visible with spot assays

640 and no phage amplification occurred, adsorption of CL31 to the WT was still  
641 detectable (Figure 2). In contrast, *C. glutamicum*  $\Delta$ *resmod*, lacking the CGP3-encoded  
642 restriction modification system, showed a clear propagation of CL31, thus,  
643 confirming the central role of the CGP3-encoded restriction modification system in  
644 phage defense [52]. Interestingly, the strain MB001 lacking all prophage elements,  
645 revealed a significantly accelerated phage amplification suggesting that so far,  
646 unknown elements of the cryptic prophages might collude with their host to confer  
647 resistance to phage infection.

648 The additional effect conferred by the presence of prophages can be in principle  
649 explained in two ways; (i) a prophage-encoded protein or RNA is interfering with  
650 CL31 amplification or (ii) the induction of the CGP3 prophage in a fraction of *C.*  
651 *glutamicum* cells is limiting the spread of the infection [53]. While the latter ‘abortive  
652 infection’-like mechanism was also hypothesized as important mechanism for  
653 different *C. glutamicum* strains to resist infection of BFK20 [54], examples of  
654 prophages assisting their host to resist superinfection have been described for  
655 different mycobacteriophages [55,56]. Besides specific restriction modification  
656 systems, Dendrick and colleagues found prophages encoding cell envelope  
657 modifying systems as well as prophages causing repressor-mediated immunity.  
658 Furthermore, special and novel defense systems were found encoded on prophages.  
659 One example is the Gp30/Gp31 system of the temperate mycobacteriophage Sbash  
660 [57]. Gentile and colleagues demonstrated the ability of this system to interrupt lytic  
661 growth of mycobacteriophage Crossroads using an ion channel to destroy the  
662 membrane potential and thus leading to a reduction of ATP synthesis.

663 One interesting target with a potential role in the recognition of foreign DNA,  
664 which is encoded on the CGP3 element, is the xenogeneic silencer CgpS. In previous  
665 studies, CgpS was described as a small nucleoid-associated protein binding to  
666 multiple targets within the cryptic prophage elements of *C. glutamicum* [5,58].  
667 However, tests with MB001 containing this silencing protein did not show any  
668 difference in infection dynamics compared to a strain carrying an integrated copy of  
669 *cgpS* (data not shown). An explanation for this observation probably lies in the  
670 binding properties of CgpS. As shown by Wiechert and colleagues, binding of CgpS  
671 requires high AT content as well as a specific binding motif [59]. CL31, in contrast,  
672 shows a similar GC content as the host (54 %) and thus might be able to escape the  
673 silencing by CgpS. Nevertheless, transcriptome analysis of WT cells infected with  
674 CL31 revealed some changed transcription of different prophage targets. Especially  
675 interesting could be the gene *cg1988* encoding an immunity repressor and its  
676 neighboring gene *cg1989* encoding a protein with similarities to a metallopeptidase.  
677 Pairs of immunity repressor and metalloprotease were recently shown to act as  
678 regulatory elements for prophage elements in *Listeria monocytogenes* [60]. Here, the  
679 metalloprotease encoded by a bacteriocin locus was shown to be upregulated in  
680 response to stress and acts as an anti-repressor protein to overcome the repression  
681 caused by a CI-like immunity repressor [60].

682 Another reason for the fast amplification of CL31 in strain MB001 could be the  
683 absence of lysogen formation. An integration of temperate phages into the host

684 chromosome requires different essential factors, i.a. an integrase protein [61].  
685 Because the CL31 genome does not encode an integrase protein on its own, this  
686 phage might be able to use a host-encoded integrase. The WT strain and the *Δresmod*  
687 strain both contain the CGP3 prophage element encoding two putative integrase  
688 subunits [3]. This CGP3 prophage element was shown to be able to excise from the  
689 host genome underlining the presence of a functional integrase. Thus, the difference  
690 in sensitivity of MB001 and *Δresmod* might also be caused by the formation of a small  
691 amount of lysogens that consequently lead to a super-infection exclusion of these  
692 lysogens [62].

693 Although this study could not experimentally prove the presence of CL31  
694 lysogens, there are multiple aspects hinting at a temperate lifestyle of CL31. Among  
695 those is the fact that CL31 typically shows a turbid plaque morphology. In some  
696 cases, small and clear plaques occur suggesting the formation of lytic CL31 mutants  
697 [63]. Furthermore, a comparison of CL31 with other *C. glutamicum* infecting phages  
698 showed the highest similarity to the temperate phage Φ16 (Figure 1).

699 Sequencing of strains resistant to CL31 infection, interestingly, showed SNPs  
700 converging in pathways required for the synthesis of mycolic acids. Mycolic acids  
701 are a central component of the cell envelope composition of *C. glutamicum*. Here,  
702 trehalose monocorynomycolate (TMCM) and trehalose dicorynomycolate (TDCM)  
703 represent the most abundant lipids in the *C. glutamicum* ATCC 13032 [64]. Together  
704 with arabinogalactan-bound mycolates they form the outer layer of the *C.*  
705 *glutamicum* envelop, which is part of the mycoloyl-arabinogalactan-peptidoglycan  
706 (mAGP) mesh [65]. Houssin et al. further described this outer membrane as spanned  
707 by e.g., porins and partly modified with an outer layer mainly consisting of glucan.  
708 For the biosynthesis of mycolic acids, two acyl-CoA carboxylase subunits (AccD2  
709 and AccD3) as well as a polyketide synthase (Cg-pks) are essential key enzymes  
710 [51,66]. Fatty acid precursors are activated by either fatty acyl AMP ligase (FadD) or  
711 acyl-CoA carboxylase complex (AccBCD2D3E) and further processed by Cg-Pks  
712 that catalyzes their condensation by a Claisen reaction, forming an  $\alpha$ -alkyl  $\beta$ -  
713 ketoester which is further reduced to a mycolic acid [51,67]. Astonishingly, different  
714 CL31-resistant strains carried SNPs in each of the three genes (*accD2*, *accD3*, and *Cg-*  
715 *pks*). All mutations were missense mutations leading to the substitution of a glycine  
716 (*accD2*, *accD3*) or a tyrosine (*Cg-pks*) with aspartic acid. Because of the structural  
717 differences between the original amino acid and the substitution, it can be assumed  
718 that the enzymes are impaired in their function. Similar to our observation for CL31-  
719 resistant strains, Gande and colleagues also described a rough colony surface of  
720 strains lacking one of the indicated genes (*accD2*, *accD3*, and *Cg-pks*) [51].  
721 Additionally, they reported a loss of extractable mycolic acids and cell wall-bound  
722 mycolic acids. A change in mycolic acid composition was previously shown to cause  
723 a phage resistance phenotype in *Mycobacterium smegmatis* [68]. Based on these data,  
724 it is, however, not yet clear whether mycolic acids are directly recognized by phages  
725 as a first adhesion layer or if the loss of receptor proteins, such as porins or  
726 transporters embedded in the outer layer of the cell envelope is responsible for the  
727 resistance.

728 Future studies along these lines will target the molecular mechanism of host cell  
729 recognition by CL31 and the escaping strategies of the host. The latter also spans the  
730 aim of elucidating the consequences of the molecular arms race between phage and  
731 bacterium with regard to envelope modifications and bacterial resistance towards  
732 environmental stresses (as e.g., described for antibiotic vulnerability of  
733 *M. tuberculosis* when expressing a certain SWU1 phage gene [69]). A loss of the  
734 external mycolic acid layer might prevent bacterial cells from phage infection, but at  
735 the same time enhance sensitivity to certain antibiotic treatments [70].

736 One further interesting observation is the differences in the tandem repeat  
737 region inside the putative minor tail protein Clg55 (Figure 1). As described before,  
738 corynomycolates can have different lengths depending on the growth condition [71].  
739 If these mycolic acids are crucial for phage recognition, the repeat region inside the  
740 minor tail protein might represent an adaptation to different host mycolic acid  
741 compositions. Interestingly, de Jong and colleagues could identify tandem repeats  
742 containing a BACON (*Bacteroides*-associated carbohydrate-binding often N-  
743 terminal) domain inside different phage tail proteins of crAss-like phage lineages  
744 infecting *Bacterioides* species. They hypothesize a possible function in host  
745 recognition [72]. The architecture of the BACON domain was associated by Mello  
746 and colleagues as being involved in carbohydrate binding [73]. Remarkably, a  
747 domain prediction using the online tool InterPro [74] revealed that Clg55 also  
748 contains a galactose-binding superfamily domain (data not shown). In a recent study  
749 focusing on *Brevibacterium aurantiacum* phages, De Melo and colleagues detected  
750 tandem repeat areas in 85% of all phage genomes available in public databases [75].

751 In summary, this work provided comprehensive insights into the genomic  
752 features of phage CL31 and its interaction with the biotechnological platform  
753 organism *C. glutamicum* ATCC 13032. Further mechanistic studies will aim at the  
754 development of novel tools for metabolic engineering and synthetic biology  
755 applications.

756

757

758 **Funding:** This research was funded by the European Research Council (ERC Starting Grant, grant number  
759 757563).

760 **Acknowledgments:** We thank Osher Fiyaksel from Prof. Sigal Ben-Yehuda's lab at the Hebrew University of  
761 Jerusalem, Israel, for assistance with the phage staining protocol. Furthermore, we thank Andrei Filipchik for  
762 his help with statistics and bioinformatic analyses. Our thanks also go to the entire Frunzke lab for constant  
763 friendly support and all stimulating discussions.

764



## 765 References

- 766 1. Becker, J.; Rohles, C.M.; Wittmann, C. Metabolically engineered *Corynebacterium glutamicum* for bio-  
767 based production of chemicals, fuels, materials, and healthcare products. *Metab. Eng.* 2018, 50, 122–141.
- 768 2. Kalinowski, J.; Bathe, B.; Bartels, D.; Bischoff, N.; Bott, M.; Burkovski, A.; Dusch, N.; Eggeling, L.;  
769 Eikmanns, B.J.; Gaigalat, L.; et al. The complete *Corynebacterium glutamicum* ATCC 13032 genome  
770 sequence and its impact on the production of L-aspartate-derived amino acids and vitamins. *J Biotechnol*  
771 **2003**, 104, 5–25.
- 772 3. Frunzke, J.; Bramkamp, M.; Schweitzer, J.E.; Bott, M. Population Heterogeneity in *Corynebacterium*  
773 *glutamicum* ATCC 13032 caused by prophage CGP3. *J Bacteriol* **2008**, 190, 5111–5119, doi:10.1128/jb.00310-  
774 08.
- 775 4. Schäfer, A.; Tauch, A.; Droste, N.; Pühler, A.; Kalinowski, J. The *Corynebacterium glutamicum* *cglIM* gene  
776 encoding a 5-cytosine methyltransferase enzyme confers a specific DNA methylation pattern in an  
777 McrBC-deficient *Escherichia coli* strain. *Gene* **1997**, 203, 95–101, doi:http://dx.doi.org/10.1016/S0378-  
778 1119(97)00519-2.
- 779 5. Pfeifer, E.; Hünnefeld, M.; Popa, O.; Polen, T.; Kohlheyer, D.; Baumgart, M.; Frunzke, J. Silencing of  
780 cryptic prophages in *Corynebacterium glutamicum*. *Nucleic Acids Res.* **2016**, 44, 10117–10131,  
781 doi:10.1093/nar/gkw692.
- 782 6. Baumgart, M.; Unthan, S.; Rückert, C.; Sivalingam, J.; Grünberger, A.; Kalinowski, J.; Bott, M.; Noack, S.;  
783 Frunzke, J. Construction of a prophage-free variant of *Corynebacterium glutamicum* ATCC 13032 for use  
784 as a platform strain for basic research and industrial biotechnology. *Appl Env. Microbiol* **2013**, 79, 6006–  
785 6015, doi:10.1128/aem.01634-13.
- 786 7. Schroven, K.; Aertsen, A.; Lavigne, R. Bacteriophages as drivers of bacterial virulence and their potential  
787 for biotechnological exploitation. *FEMS Microbiol. Rev.* **2021**, 45, 1–15, doi:10.1093/femsre/uaa041.
- 788 8. Lammens, E.M.; Nikel, P.I.; Lavigne, R. Exploring the synthetic biology potential of bacteriophages for  
789 engineering non-model bacteria. *Nat. Commun.* **2020**, 11, 5294, doi:10.1038/s41467-020-19124-x.
- 790 9. Lobanova, J.S.; Gak, E.R.; Andreeva, I.G.; Rybak, K. V.; Krylov, A.A.; Mashko, S. V. Complete nucleotide  
791 sequence and annotation of the temperate coryneophage  $\phi$ 16 genome. *Arch. Virol.* **2017**, 162, 2489–2492,  
792 doi:10.1007/s00705-017-3383-4.
- 793 10. Moreau, S.; Blanco, C.; Trautwetter, A. Site-specific integration of coryneophage Phi16: Construction of  
794 an integration vector. *Microbiology* **1999**, 145, 539–548, doi:10.1099/13500872-145-3-539.
- 795 11. Moreau, S.; Leret, V.; Le Marrec, C.; Varangot, H.; Ayache, m.; Bonnassie, S.; Blanco, C.; Trautwetter, A.  
796 Prophage distribution in coryneform bacteria. *Res. Microbiol.* **1995**, 146, 493–505, doi:10.1016/0923-  
797 2508(96)80295-6.
- 798 12. Koptides, M.; Barak, I.; Sisova, M.; Baloghova, E.; Ugorcakova, J.; Timko, J. Characterization of  
799 bacteriophage BFK20 from *Brevibacterium flavum*. *J. Gen. Microbiol.* **1992**, 138, 1387–1391,  
800 doi:10.1099/00221287-138-7-1387.
- 801 13. Bukovska, G.; Klucar, L.; Vlcek, C.; Adamovic, J.; Turna, J.; Timko, J. Complete nucleotide sequence and  
802 genome analysis of bacteriophage BFK20 - A lytic phage of the industrial producer *Brevibacterium flavum*.  
803 *Virology* **2006**, 348, 57–71, doi:10.1016/j.virol.2005.12.010.
- 804 14. Yomantas, Y.A.V. V.; Abalakina, E.G.; Lobanova, J.S.; Mamontov, V.A.; Stoyanova, N. V.; Mashko, S. V.  
805 Complete nucleotide sequences and annotations of  $\phi$ 673 and  $\phi$ 674, two newly characterised lytic phages  
806 of *Corynebacterium glutamicum* ATCC 13032. *Arch. Virol.* **2018**, 163, 1–4, doi:10.1007/s00705-018-3867-x.
- 807 15. Chen, C.L.; Pan, T.Y.; Kan, S.C.; Kuan, Y.C.; Hong, L.Y.; Chiu, K.R.; Sheu, C. Sen; Yang, J. Sen; Hsu, W.H.;

- 808 Hu, H.Y. Genome sequence of the lytic bacteriophage P1201 from *Corynebacterium glutamicum* NCHU  
809 87078: Evolutionary relationships to phages from Corynebacterineae. *Virology* **2008**, *378*, 226–232,  
810 doi:10.1016/j.virol.2008.05.027.
- 811 16. Majtan, T.; Halgasova, N.; Bukovska, G.; Timko, J. Transcriptional profiling of bacteriophage BFK20:  
812 Coexpression interrogated by “guilt-by-association” algorithm. *Virology* **2007**, *359*, 55–65,  
813 doi:10.1016/j.virol.2006.09.028.
- 814 17. Tkacova, A.; Orieskova, M.; Halgasova, N.; Bocanova, L.; Bukovska, G. Identification of *Brevibacterium*  
815 *flavum* genes related to receptors involved in bacteriophage BFK20 adsorption. *Virus Res.* **2019**, *274*,  
816 197775, doi:10.1016/j.virusres.2019.197775.
- 817 18. Hashiro, S.; Mitsuhashi, M.; Yasueda, H. Overexpression system for recombinant RNA in  
818 *Corynebacterium glutamicum* using a strong promoter derived from corynephage BFK20. *J. Biosci. Bioeng.*  
819 **2019**, *128*, 255–263, doi:10.1016/j.jbiosc.2019.03.003.
- 820 19. Moreau, S.; Blanco, C.; Trautwetter, A. Site-specific integration of corynephage  $\Phi$ 16: Construction of an  
821 integration vector. *Microbiology* **1999**, *145*, 539–548, doi:10.1099/13500872-145-3-539.
- 822 20. YEH, P.; OREGLIA, J.; SICARD, A.M. Transfection of *Corynebacterium lilium* Protoplasts. *Microbiology*  
823 **1985**, *131*, 3179–3183, doi:10.1099/00221287-131-12-3179.
- 824 21. Trautwetter, A.; Blanco, C.; Sicard, A.M. Structural characteristics of the *Corynebacterium lilium*  
825 bacteriophage CL31. *J. Virol.* **1987**, *61*, 1540–5.
- 826 22. Russell, D.A.; Hatfull, G.F. PhagesDB: the actinobacteriophage database. *Bioinformatics* **2017**, *33*, 784–786,  
827 doi:10.1093/bioinformatics/btw711.
- 828 23. Sambrook, J.; Russell, D.W. Molecular Cloning: A Laboratory Manual . Joseph Sambrook , David W.  
829 Russell. *Q. Rev. Biol.* **2001**, *76*, 348–349, doi:10.1086/394015.
- 830 24. Kensy, F.; Zang, E.; Faulhammer, C.; Tan, R.-K.K.; Büchs, J.; Büchs, J.; Büchs, J. Validation of a high-  
831 throughput fermentation system based on online monitoring of biomass and fluorescence in  
832 continuously shaken microtiter plates. *Microb Cell Fact* **2009**, *8*, 31, doi:10.1186/1475-2859-8-31.
- 833 25. Kinoshita, S.; Udaka, S.; Shimono, M. Studies on the amino acid fermentation. Part 1. Production of L-  
834 glutamic acid by various microorganisms. *J Gen Appl Microbiol* **2004**, *50*, 331–343.
- 835 26. Schäfer, A.; Tauch, A.; Jäger, W.; Kalinowski, J.; Thierbach, G.; Pühler, A. Small mobilizable multi-  
836 purpose cloning vectors derived from the *Escherichia coli* plasmids pK18 and pK19: selection of defined  
837 deletions in the chromosome of *Corynebacterium glutamicum*. *Gene* **1994**, *145*, 69–73.
- 838 27. Gibson, D.G.; Young, L.; Chuang, R.Y.; Venter, J.C.; Hutchison 3rd, C.A.; Smith, H.O.; Hutchison, C.A.;  
839 Smith, H.O. Enzymatic assembly of DNA molecules up to several hundred kilobases. *Nat Methods* **2009**,  
840 *6*, 343–345, doi:10.1038/nmeth.1318.
- 841 28. Schäfer, A.; Tauch, A.; Jäger, W.; Kalinowski, J.; Thierbach, G.; Pühler, A. Small mobilizable multi-  
842 purpose cloning vectors derived from the *Escherichia coli* plasmids pK18 and pK19: selection of defined  
843 deletions in the chromosome of *Corynebacterium glutamicum*. *Gene* **1994**, *145*, 69–73, doi:10.1016/0378-  
844 1119(94)90324-7.
- 845 29. Niebisch, A.; Bott, M. Molecular analysis of the cytochrome bc<sub>1</sub>-aa<sub>3</sub> branch of the *Corynebacterium*  
846 *glutamicum* respiratory chain containing an unusual diheme cytochrome c<sub>1</sub>. *Arch. Microbiol.* **2001**, *175*,  
847 282–294, doi:10.1007/s002030100262.
- 848 30. Hardy, A.; Sharma, V.; Kever, L.; Frunzke, J. Genome Sequence and Characterization of Five  
849 Bacteriophages Infecting *Streptomyces coelicolor* and *Streptomyces venezuelae*: Alderaan, Coruscant,  
850 Dagobah, Endor1 and Endor2. *Viruses* **2020**, *12*, 1065, doi:10.3390/v12101065.
- 851 31. Mcnair, K.; Zhou, C.; Dinsdale, E.A.; Souza, B.; Edwards, R.A. PHANOTATE: A novel approach to gene

- 852 identification in phage genomes. *Bioinformatics* **2019**, *35*, 4537–4542, doi:10.1093/bioinformatics/btz265.
- 853 32. Besemer, J.; Lomsadze, A.; Borodovsky, M. GeneMarkS: A self-training method for prediction of gene  
854 starts in microbial genomes. Implications for finding sequence motifs in regulatory regions. *Nucleic Acids*  
855 *Res.* **2001**, *29*, 2607–2618, doi:10.1093/nar/29.12.2607.
- 856 33. Ecale Zhou, C.L.; Malfatti, S.; Kimbrel, J.; Philipson, C.; McNair, K.; Hamilton, T.; Edwards, R.; Souza, B.  
857 MultiPhATE: Bioinformatics pipeline for functional annotation of phage isolates. *Bioinformatics* **2019**, *35*,  
858 4402–4404, doi:10.1093/bioinformatics/btz258.
- 859 34. Altschul, S.F.; Gish, W.; Miller, W.; Myers, E.W.; Lipman, D.J. Basic local alignment search tool. *J Mol*  
860 *Biol* **1990**, *215*, 403–410, doi:10.1016/S0022-2836(05)80360-2.
- 861 35. Graziotin, A.L.; Koonin, E. V.; Kristensen, D.M. Prokaryotic Virus Orthologous Groups (pVOGs): A  
862 resource for comparative genomics and protein family annotation. *Nucleic Acids Res.* **2017**, *45*, D491–  
863 D498, doi:10.1093/nar/gkw975.
- 864 36. Marchler-Bauer, A.; Derbyshire, M.K.; Gonzales, N.R.; Lu, S.; Chitsaz, F.; Geer, L.Y.; Geer, R.C.; He, J.;  
865 Gwadz, M.; Hurwitz, D.L.; et al. CDD: NCBI's conserved domain database. *Nucleic Acids Res.* **2015**, *43*,  
866 D222–D226, doi:10.1093/nar/gku1221.
- 867 37. Garneau, J.R.; Depardieu, F.; Fortier, L.C.; Bikard, D.; Monot, M. PhageTerm: A tool for fast and accurate  
868 determination of phage termini and packaging mechanism using next-generation sequencing data. *Sci.*  
869 *Rep.* **2017**, *7*, 1–10, doi:10.1038/s41598-017-07910-5.
- 870 38. Sims, G.E.; Jun, S.R.; Wu, G.A.; Kim, S.H. Alignment-free genome comparison with feature frequency  
871 profiles (FFP) and optimal resolutions. *Proc. Natl. Acad. Sci. U. S. A.* **2009**, *106*, 2677–2682,  
872 doi:10.1073/pnas.0813249106.
- 873 39. Zielezinski, A.; Vinga, S.; Almeida, J.; Karlowski, W.M. Alignment-free sequence comparison: Benefits,  
874 applications, and tools. *Genome Biol.* **2017**, *18*, 1–17.
- 875 40. Wickham, H. *ggplot2: Elegant Graphics for Data Analysis*; Springer-Verlag New York, 2016; ISBN 978-3-  
876 319-24277-4.
- 877 41. Pritchard, L.; Glover, R.H.; Humphris, S.; Elphinstone, J.G.; Toth, I.K. Genomics and taxonomy in  
878 diagnostics for food security: Soft-rotting enterobacterial plant pathogens. *Anal. Methods* **2016**, *8*, 12–24.
- 879 42. Gu, Z.; Eils, R.; Schlesner, M. Complex heatmaps reveal patterns and correlations in multidimensional  
880 genomic data. *Bioinformatics* **2016**, *32*, 2847–2849, doi:10.1093/bioinformatics/btw313.
- 881 43. Moraru, C.; Varsani, A.; Kropinski, A.M. VIRIDIC—A Novel Tool to Calculate the Intergenomic  
882 Similarities of Prokaryote-Infecting Viruses. *Viruses* **2020**, *12*, 1268, doi:10.3390/v12111268.
- 883 44. Marchler-Bauer, A.; Bo, Y.; Han, L.; He, J.; Lanczycki, C.J.; Lu, S.; Chitsaz, F.; Derbyshire, M.K.; Geer,  
884 R.C.; Gonzales, N.R.; et al. CDD/SPARCLE: Functional classification of proteins via subfamily domain  
885 architectures. *Nucleic Acids Res.* **2017**, *45*, D200–D203, doi:10.1093/nar/gkw1129.
- 886 45. Laemmli, U.K. Cleavage of structural proteins during the assembly of the head of bacteriophage T4.  
887 *Nature* **1970**, *227*, 680–685.
- 888 46. Lavigne, R.; Ceysens, P.J.; Robben, J. Phage proteomics: applications of mass spectrometry. *Methods*  
889 *Mol. Biol.* **2009**, *502*, 239–251, doi:10.1007/978-1-60327-565-1\_14.
- 890 47. Rappsilber, J.; Mann, M.; Ishihama, Y. Protocol for micro-purification, enrichment, pre-fractionation and  
891 storage of peptides for proteomics using StageTips. *Nat. Protoc.* **2007**, *2*, 1896–1906,  
892 doi:10.1038/nprot.2007.261.
- 893 48. Yu, Y.; Yu, Y.; Smith, M.; Pieper, R. A spinnable and automatable StageTip for high throughput peptide  
894 desalting and proteomics. *Protoc. Exch.* **2014**, doi:10.1038/protex.2014.033.
- 895 49. Mavrich, T.N.; Hatfull, G.F. Bacteriophage evolution differs by host, lifestyle and genome. *Nat. Microbiol.*

- 896           **2017**, 2, 1–9, doi:10.1038/nmicrobiol.2017.112.
- 897 50. Seemann, T. Snippy: Rapid haploid variant calling and core genome alignment. Available online:  
898           <https://github.com/tseemann/snippy> (accessed on Dec 11, 2020).
- 899 51. Gande, R.; Gibson, K.J.C.; Brown, A.K.; Krumbach, K.; Dover, L.G.; Sahm, H.; Shioyama, S.; Oikawa, T.;  
900           Besra, G.S.; Eggeling, L. Acyl-CoA carboxylases (*accD2* and *accD3*), together with a unique polyketide  
901           synthase (*Cg-pks*), are key to mycolic acid biosynthesis in *Corynebacteriaceae* such as *Corynebacterium*  
902           *glutamicum* and *Mycobacterium tuberculosis*. *J. Biol. Chem.* **2004**, 279, 44847–44857,  
903           doi:10.1074/jbc.M408648200.
- 904 52. Schafer, A.; Schwarzer, A.; Kalinowski, J.; Puhler, A. Cloning and characterization of a DNA region  
905           encoding a stress-sensitive restriction system from *Corynebacterium glutamicum* ATCC 13032 and analysis  
906           of its role in intergeneric conjugation with *Escherichia coli*. *J. Bacteriol.* **1994**, 176, 7309–7319,  
907           doi:10.1128/jb.176.23.7309-7319.1994.
- 908 53. Chopin, M.C.; Chopin, A.; Bidnenko, E. Phage abortive infection in lactococci: Variations on a theme.  
909           *Curr. Opin. Microbiol.* 2005, 8, 473–479.
- 910 54. Halgašová, N.; Majtán, T.; Ugorčáková, J.; Timko, J.; Bukovská, G. Resistance of corynebacterial strains  
911           to infection and lysis by corynephage BFK 20. *J. Appl. Microbiol.* **2005**, 98, 184–192, doi:10.1111/j.1365-  
912           2672.2004.02448.x.
- 913 55. Mavrich, T.N.; Hatfull, G.F. Evolution of Superinfection Immunity in Cluster A Mycobacteriophages.  
914           *MBio* **2019**, 10, doi:10.1128/mBio.00971-19.
- 915 56. Dedrick, R.M.; Jacobs-Sera, D.; Guerrero Bustamante, C.A.; Garlena, R.A.; Mavrich, T.N.; Pope, W.H.;  
916           Cervantes Reyes, J.C.; Russell, D.A.; Adair, T.; Alvey, R.; et al. Prophage-mediated defence against viral  
917           attack and viral counter-defence. *Nat. Microbiol.* **2017**, 2, 16251, doi:10.1038/nmicrobiol.2016.251.
- 918 57. Gentile, G.M.; Wetzel, K.S.; Dedrick, R.M.; Montgomery, M.T.; Garlena, R.A.; Jacobs-Sera, D.; Hatfull,  
919           G.F. More Evidence of Collusion: a New Prophage-Mediated Viral Defense System Encoded by  
920           Mycobacteriophage Sbash. *MBio* **2019**, 10, e00196-19, doi:10.1128/mBio.00196-19.
- 921 58. Pfeifer, E.; Hünnefeld, M.; Popa, O.; Frunzke, J. Impact of Xenogeneic Silencing on Phage–Host  
922           Interactions. *J. Mol. Biol.* **2019**, 431, 4670–4683, doi:10.1016/j.jmb.2019.02.011.
- 923 59. Wiechert, J.; Filipchuk, A.; Hünnefeld, M.; Gätgens, C.; Brehm, J.; Heermann, R.; Frunzke, J. Deciphering  
924           the rules underlying xenogeneic silencing and counter-silencing of Lsr2-like proteins using CgpS of  
925           *Corynebacterium glutamicum* as a model. *MBio* **2020**, 11, doi:10.1128/mBio.02273-19.
- 926 60. Argov, T.; Sapir, S.R.; Pasechnek, A.; Azulay, G.; Stadnyuk, O.; Rabinovich, L.; Sigal, N.; Borovok, I.;  
927           Herskovits, A.A. Coordination of cohabiting phage elements supports bacteria–phage cooperation. *Nat.*  
928           *Commun.* **2019**, 10, 5288, doi:10.1038/s41467-019-13296-x.
- 929 61. Groth, A.C.; Calos, M.P. Phage integrases: Biology and applications. *J. Mol. Biol.* 2004, 335, 667–678.
- 930 62. Rostøl, J.T.; Marraffini, L. (Ph)ighting Phages: How Bacteria Resist Their Parasites. *Cell Host Microbe* 2019,  
931           25, 184–194.
- 932 63. Verheust, C.; Fornelos, N.; Mahillon, J. GIL16, a new gram-positive tectiviral phage related to the *Bacillus*  
933           *thuringiensis* GIL01 and the *Bacillus cereus* pBClin15 elements. *J. Bacteriol.* **2005**, 187, 1966–1973,  
934           doi:10.1128/JB.187.6.1966-1973.2005.
- 935 64. Klatt, S.; Brammananth, R.; O’Callaghan, S.; Kouremenos, K.A.; Tull, D.; Crellin, P.K.; Coppel, R.L.;  
936           McConville, M.J. Identification of novel lipid modifications and intermembrane dynamics in  
937           *Corynebacterium glutamicum* using high-resolution mass spectrometry. *J. Lipid Res.* **2018**, 59, 1190–1204,  
938           doi:10.1194/jlr.M082784.
- 939 65. Houssin, C.; de Sousa d’Auria, C.; Constantinesco, F.; Dietrich, C.; Labarre, C.; Bayan, N. Architecture

- 940 and Biogenesis of the Cell Envelope of *Corynebacterium glutamicum*. In; Springer, Cham, 2020; pp. 25–60.
- 941 66. Gande, R.; Dover, L.G.; Krumbach, K.; Besra, G.S.; Sahm, H.; Oikawa, T.; Eggeling, L. The two  
942 carboxylases of *Corynebacterium glutamicum* essential for fatty acid and mycolic acid synthesis. *J. Bacteriol.*  
943 **2007**, *189*, 5257–5264, doi:10.1128/JB.00254-07.
- 944 67. Portevin, D.; De Sousa-D’Auria, C.; Houssin, C.; Grimaldi, C.; Chami, M.; Daffe, M.; Guilhot, C.; Daffé,  
945 M.; Guilhot, C. A polyketide synthase catalyzes the last condensation step of mycolic acid biosynthesis  
946 in mycobacteria and related organisms. *Proc Natl Acad Sci U S A* **2004**, *101*, 314–319,  
947 doi:10.1073/pnas.0305439101.
- 948 68. Di Capua, C.B.; Belardinelli, J.M.; Buchieri, M. V.; Bortolotti, A.; Franceschelli, J.J.; Morbidoni, H.R.  
949 Deletion of *msmeg\_1350* in *Mycobacterium smegmatis* causes loss of epoxy-mycolic acids, fitness  
950 alteration at low temperature and resistance to a set of mycobacteriophages. *Microbiol. (United Kingdom)*  
951 **2018**, *164*, 1567–1582, doi:10.1099/mic.0.000734.
- 952 69. Li, Q.; Zhou, M.; Fan, X.; Yan, J.; Li, W.; Xie, J. Mycobacteriophage SWU1 gp39 can potentiate multiple  
953 antibiotics against *Mycobacterium* via altering the cell wall permeability. *Sci. Rep.* **2016**, *6*, 1–14,  
954 doi:10.1038/srep28701.
- 955 70. Mangalea, M.R.; Duerkop, B.A. Fitness trade-offs resulting from bacteriophage resistance potentiate  
956 synergistic antibacterial strategies. *Infect. Immun.* **2020**, *88*, doi:10.1128/IAI.00926-19.
- 957 71. Yang, Y.; Shi, F.; Tao, G.; Wang, X. Purification and Structure Analysis of Mycolic Acids in  
958 *Corynebacterium glutamicum*. *J. Microbiol.* **2012**, *50*, 235–240, doi:10.1007/s12275-012-1459-0.
- 959 72. De Jonge, P.A.; Von Meijenfildt, F.A.B.; Van Rooijen, L.E.; Brouns, S.J.J.; Dutilh, B.E. Evolution of  
960 BACON domain tandem repeats in crassphage and novel gut bacteriophage lineages. *Viruses* **2019**, *11*,  
961 doi:10.3390/v11121085.
- 962 73. Mello, L. V.; Chen, X.; Rigden, D.J. Mining metagenomic data for novel domains: BACON, a new  
963 carbohydrate-binding module. *FEBS Lett.* **2010**, *584*, 2421–2426, doi:10.1016/j.febslet.2010.04.045.
- 964 74. Mitchell, A.; Chang, H.Y.; Daugherty, L.; Fraser, M.; Hunter, S.; Lopez, R.; McAnulla, C.; McMenamin,  
965 C.; Nuka, G.; Pesseat, S.; et al. The InterPro protein families database: the classification resource after 15  
966 years. *Nucleic Acids Res* **2015**, *43*, D213-21, doi:10.1093/nar/gku1243.
- 967 75. de Melo, A.G.; Rousseau, G.M.; Tremblay, D.M.; Labrie, S.J.; Moineau, S. DNA tandem repeats  
968 contribute to the genetic diversity of *Brevibacterium aurantiacum* phages. *Environ. Microbiol.* **2020**, *22*,  
969 3413–3428, doi:10.1111/1462-2920.15113.

970
